# Supplementary material for: Large Deletions at the SHOX Locus in the Pseudoautosomal Region Are Associated with Skeletal Atavism in Shetland Ponies
Source: PubMed Central journal article supplement (PMC4938674; doi:10.1534/g3.116.029645), 2016-05-19
Supplement: supp_g3.116.029645_FigureS1.pdf [file supp_g3.116.029645_FigureS1.pdf]

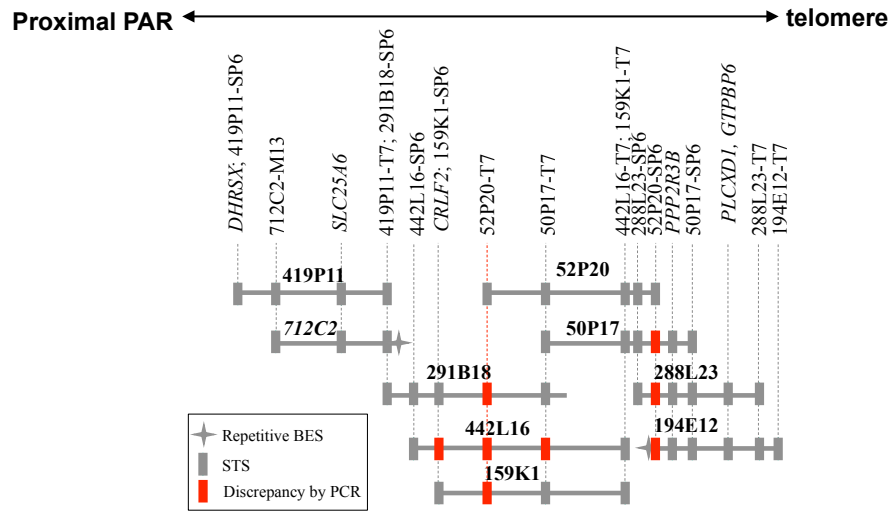

**Figure S1.** BAC clone coordinates on chrUn (see Raudsepp et al., 2012)
