# Supplementary material for: Large Deletions at the SHOX Locus in the Pseudoautosomal Region Are Associated with Skeletal Atavism in Shetland Ponies
Source: PubMed Central journal article supplement (PMC4938674; doi:10.1534/g3.116.029645), 2016-05-19
Supplement: supp_g3.116.029645_Table_S2.pdf [file supp_g3.116.029645_Table_S2.pdf]

**Table S2.** Assembly statistics of regions with signature of deletion (The coordinates are based on UCSC genome browser concatenation of unassigned scaffolds).

| <b>Chromosome</b> | <b>Start</b> | <b>End</b>  | <b>scaffold</b> | <b>Size<sup>a</sup></b> | <b>#contigs</b> | <b>Min<sup>b</sup><br/>(bp)</b> | <b>Max<sup>c</sup><br/>(bp)</b> | <b>GC<br/>%</b> | <b>Locus<sup>d</sup></b> |
|-------------------|--------------|-------------|-----------------|-------------------------|-----------------|---------------------------------|---------------------------------|-----------------|--------------------------|
| 1 <sup>e</sup>    | 23,547,000   | 23,549,000  | scaffold_5      | 2,000                   | 1               | 78,820                          | 78,820                          | 37.23           | Del-1                    |
| Un                | 26,645,953   | 26,647,166  | chrUn0036       | 1,214                   | 1               | 1,399                           | 27,363                          | 50.74           | Del-1                    |
| Un                | 26,650,752   | 26,745,752  | chrUn0036       | 59,908                  | 12              | 1,399                           | 27,363                          | 58.10           | Del-1                    |
| Un                | 26,747,752   | 26,779,752  | chrUn0036       | 15,671                  | 6               | 783                             | 7,114                           | 56.67           | Del-2                    |
| Un                | 31,010,752   | 31,011,752  | chrUn0050       | 1,000                   | 1               | 30,216                          | 30,216                          | 52.36           | Del-1                    |
| Un                | 49,746,752   | 49,806,752  | chrUn0189       | 51,310                  | 8               | 1,984                           | 19,319                          | 56.11           | Del-2                    |
| Un                | 50,401,752   | 50,404,752  | chrUn0198       | 2,000                   | 1               | 30,666                          | 30,666                          | 52.48           | Del-1                    |
| Un                | 53,315,752   | 53,319,752  | chrUn0250       | 4,000                   | 1               | 27,756                          | 27,756                          | 52.60           | Del-1                    |
| Un                | 62,955,752   | 62,957,752  | chrUn0568       | 1,758                   | 1               | 8,549                           | 8,549                           | 51.62           | Del-1                    |
| Un                | 65,524,752   | 65,525,752  | chrUn0717       | 1,000                   | 1               | 8,048                           | 8,048                           | 51.22           | Del-1                    |
| Un                | 67,675,752   | 67,684,752  | chrUn0874       | 6,000                   | 3               | 1,555                           | 3,101                           | 49.73           | Del-1                    |
| Un                | 69,440,752   | 69,454,752  | chrUn1005       | 6,860                   | 4               | 1,396                           | 3,015                           | 53.90           | Del-2                    |
| Un                | 93,181,752   | 93,184,752  | chrUn4326       | 2,731                   | 1               | 4,165                           | 4,165                           | 50.62           | Del-1                    |
| Un                | 103,088,752  | 103,094,752 | chrUn6292       | 3,503                   | 2               | 1,516                           | 1,987                           | 54.18           | Del-2                    |

<sup>a</sup> Size of deleted sequence.

<sup>b</sup> Minimum size of contig in given coordinate.

<sup>c</sup> Maximum size of contig in given coordinate.

<sup>d</sup> Del-1: Regions where three of the cases (Case1, Case5, Case6) show deletion. Del-2: Regions where all cases show deletion.

<sup>e</sup> 90% of this region is repetitive elements (SINE/LINE).
