# Supplementary material for: Large Deletions at the SHOX Locus in the Pseudoautosomal Region Are Associated with Skeletal Atavism in Shetland Ponies
Source: PubMed Central journal article supplement (PMC4938674; doi:10.1534/g3.116.029645), 2016-05-19
Supplement: supp_g3.116.029645_Table_S4.pdf [file supp_g3.116.029645_Table_S4.pdf]

**Table S4.** BAC-derived consensus contigs statistics.

| <b>Contig</b> | <b>BAC clone</b>         | <b>Size (bp)</b> | <b>GC%</b> |
|---------------|--------------------------|------------------|------------|
|               | 194E12 (1 <sup>a</sup> ) |                  |            |
| <b>BAC-C1</b> | 50P17 (1)                | 240,449          | 58.53      |
|               | 291B18 (3)               |                  |            |
| <b>BAC-C2</b> | 52P20                    | 44,256           | 56.64      |
| <b>BAC-C3</b> | 712C2                    | 140,175          | 55.80      |

<sup>a</sup> Number in parentheses shows numbers of contigs used to generate BAC-derived contigs
